# Supplementary material for: Building early-larval sexing systems for genetic control of the Australian sheep blow fly Lucilia cuprina using two constitutive promoters
Source: PubMed Central journal article supplement (PMC5451413; doi:10.1038/s41598-017-02763-4), 2017-05-31

Method: Neighbor Joining; Bootstrap (1000 reps); tie breaking = Systematic

Distance: Uncorrected ("p")

Gaps distributed proportionally

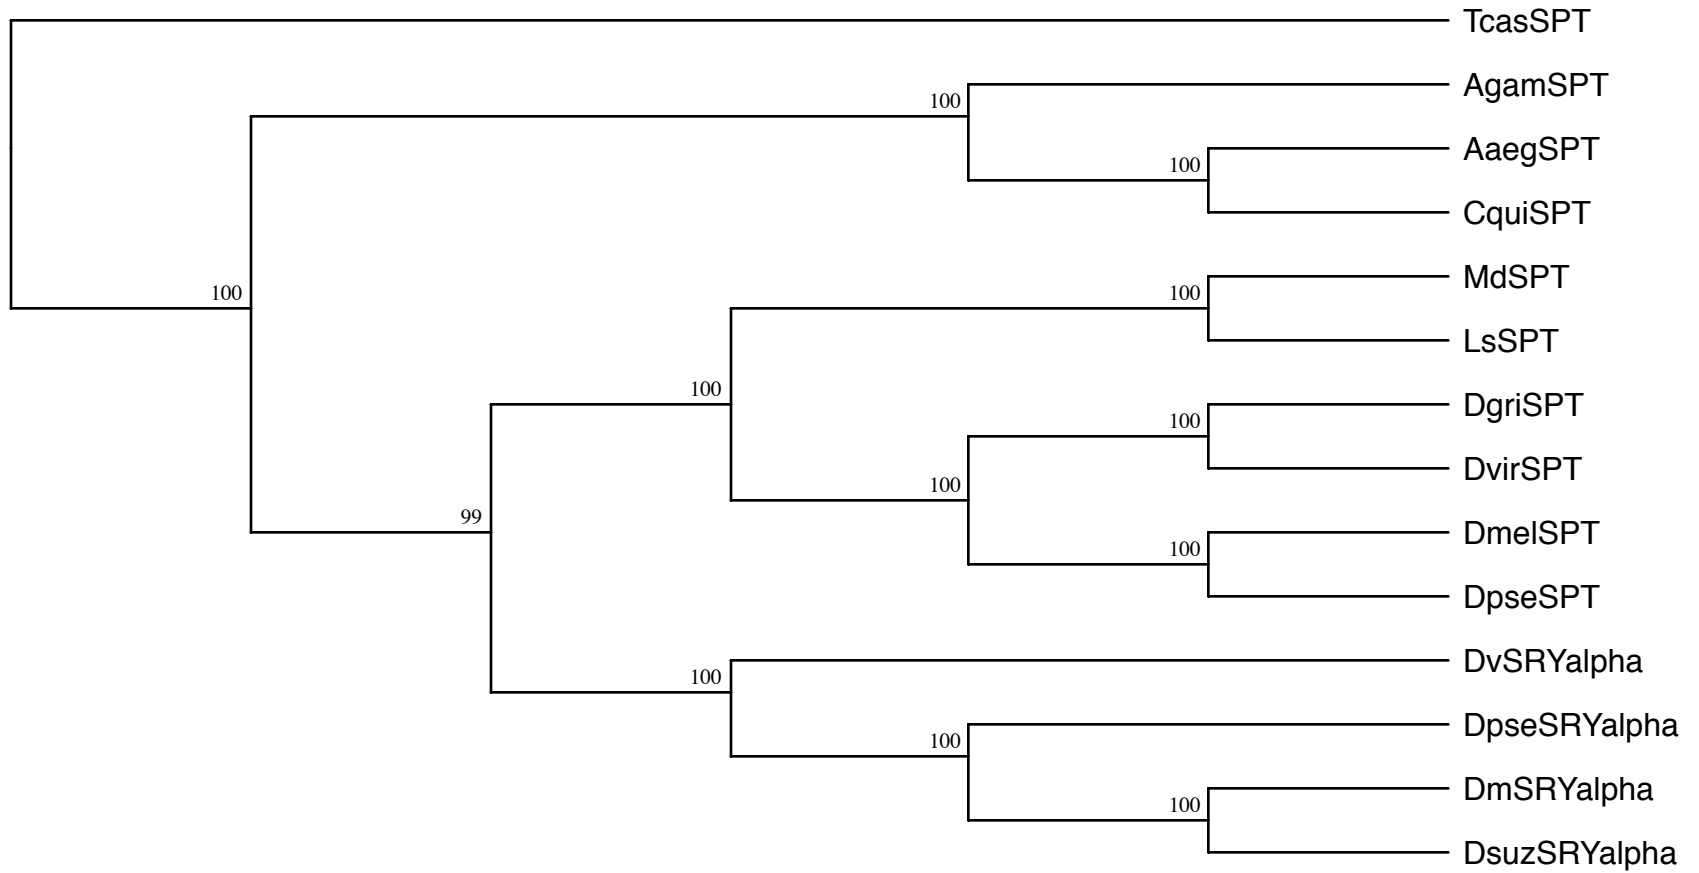

10 20 30 40 50 60 70 80 90 100 110  
AAATAAATAAAAATGAAAAAATTCAGACGGCGATTAAACTTATCGGTTTTTCGTTGCGCGAGTGTGTGCGTGAATCGTGTGTTGTATTTGTTGTATTTTCAATGCGGGTTTA

120 130 140 150 160 170 180 190 200 210 220  
TTACTCATTCTCGTTTTCTCATTCTCATTACTCAAATACGAAATCTCTAGAAATATGGCAACAATGCTGCACGTTTTGTGCATCCAATGGATGCCATCCATACCCATA

230 240 250 260 270 280 290 300 310 320 330  
TATGGTAAAATGTCTGAAAAACACTAGAGAACCCATATGAAACGCGTTTTGATAAGGGTAGCCGCCTTTATAAGCGCTTGTAACAACGAGTTTTACTATCATTAAAGTTTG

340 350 360 370 380 390 400 410 420 430 440  
CGTTCTTGTGCTGTGTGGATACCAACGCGAGACCTCCCAAACCAACAAAAGACTTAATTTATTTATTTAATTTTAGTAATTTAATAAAACACAAAGTAAGTATTTTGTA

450 460 470 480  
TAAGCAACAGCAGCGACAAACAATAAAACTAGTGAAAAAT

**Relative tTA<sub>v</sub>  
Expression**

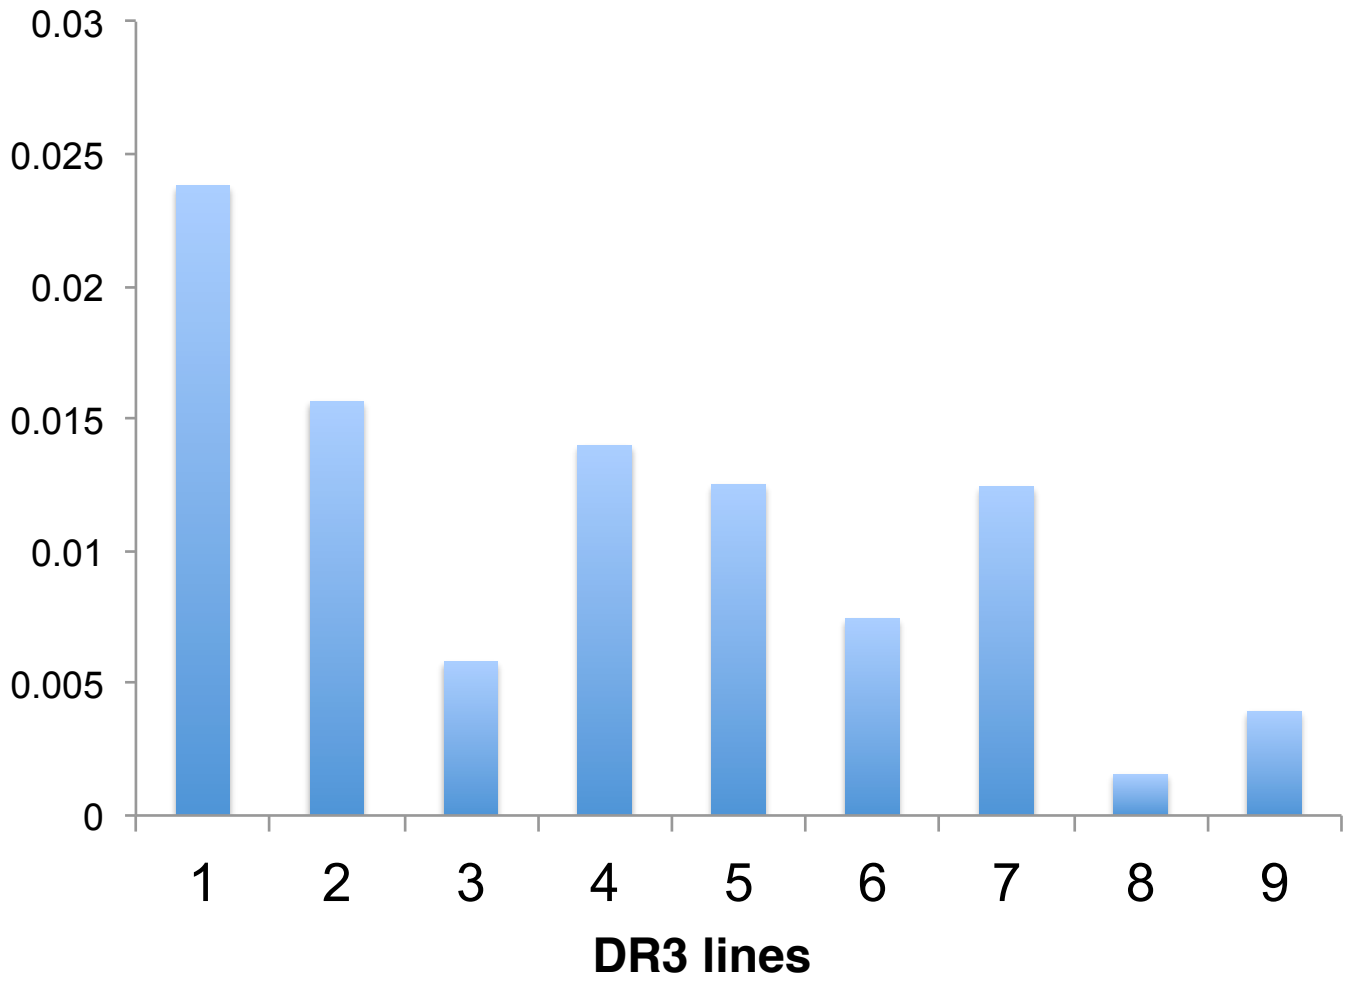

**DR5#2**

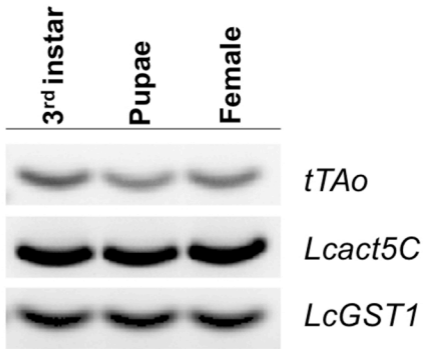

Supplement: 41598_2017_2763_MOESM2_ESM.pdf [file 41598_2017_2763_MOESM2_ESM.pdf]
